# Supplementary material for: Biocatalytic self-assembly of 2D peptide-based nanostructures
Source: Royal Society of Chemistry journal article supplement (doi:10.1039/c1sm05981e), 2011-01-01
Supplement: c1sm05981e.pdf [file c1sm05981e.pdf]

# Biocatalytic Self-Assembly of 2D Peptide- Based Nanostructures

Meghan Hughes, Haixia Xu, Pim Frederix, Andrew Smith, Neil T. Hunt, Tell Tuttle,  
Ian Kinloch and Rein V. Ulijn

## Supplementary Information

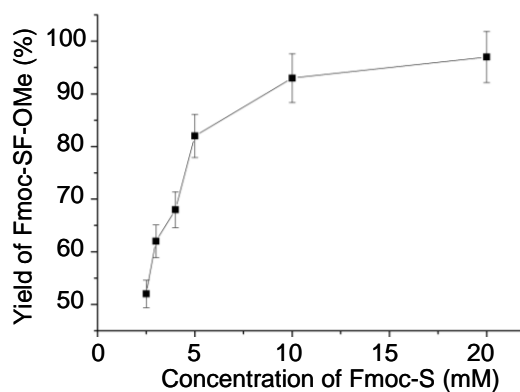

**Figure S1** – The relationship between concentration of Fmoc-S reactant used and the percentage yield of the desired aromatic peptide amphiphile Fmoc-SF-OMe; lower concentration of starting materials leads to lower product yields. Percentage yield calculated using HPLC method at 100 hours after the reaction was initiated.

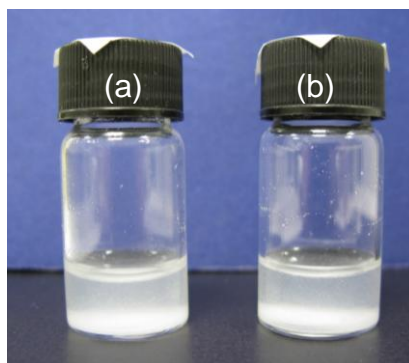

**Figure S2** – Synthesised Fmoc-SF-OMe (a), or a mixture of synthesised Fmoc-SF-OMe and F-OMe (b), forms a white precipitate in the aqueous buffer. Images taken after 24 hours.

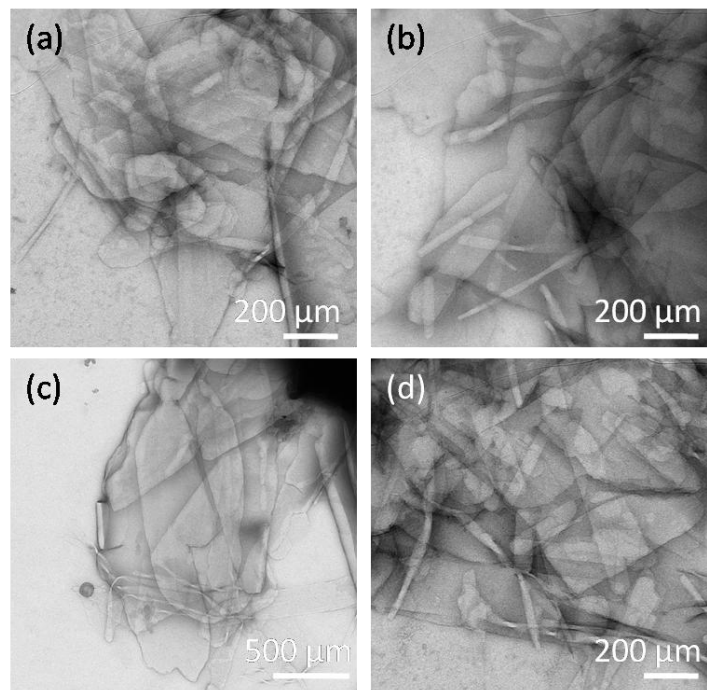

**Figure S3** – (a-d) Transmission Electron Microscopy (TEM) images of the nanoscale structure of Fmoc-SF-OMe after 72 hours.

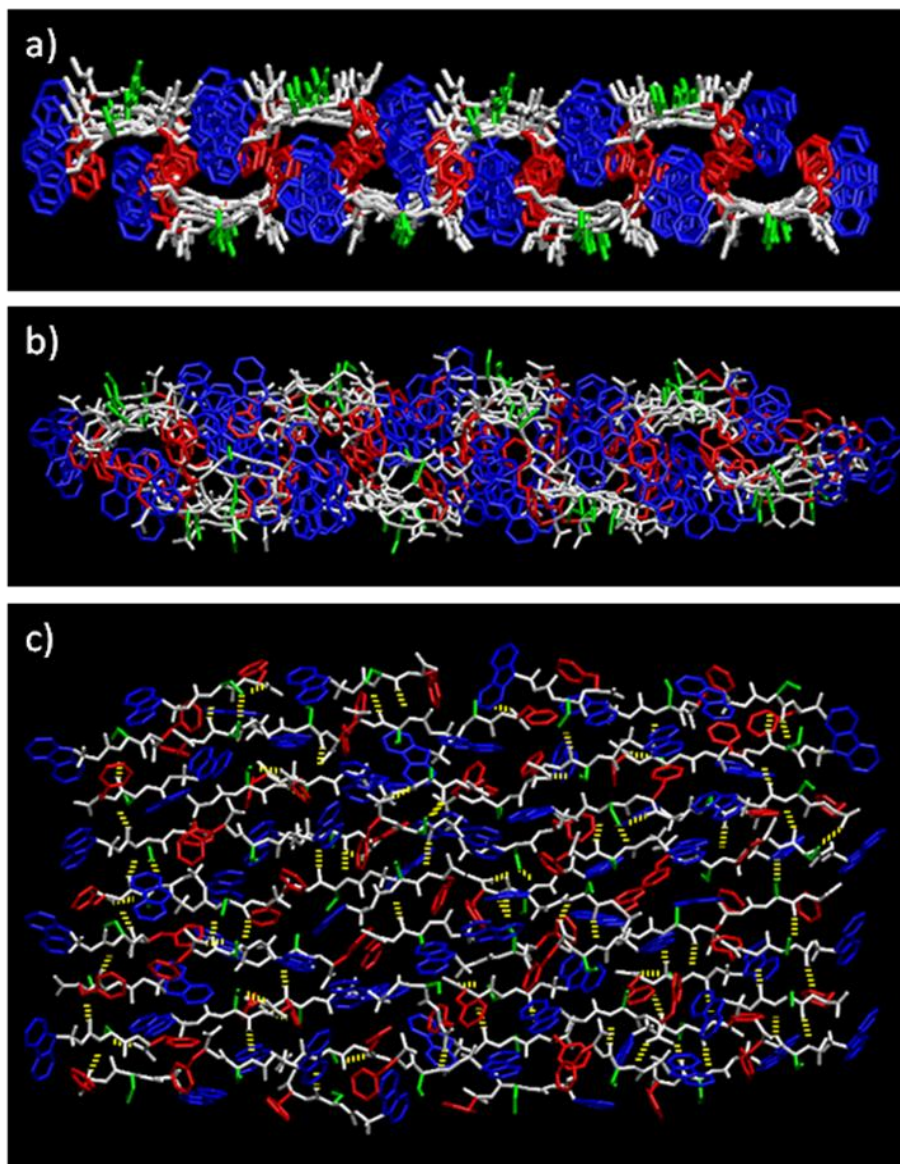

**Figure S4** - Fmoc-SF-OMe 64mer model: Blue: fluorenyl groups. White: peptide backbone. Red: phenylalanine side chains. Green: serine side chains. Hydrogens not shown for clarity. (a) Side view of starting structure. (b) Side view of structure minimized for 50000 steps. (c) Top view of minimized structure. Dotted yellow lines indicate hydrogen bonds with  $d < 3.4 \text{ \AA}$  and donor-acceptor angle  $< 25^\circ$ .

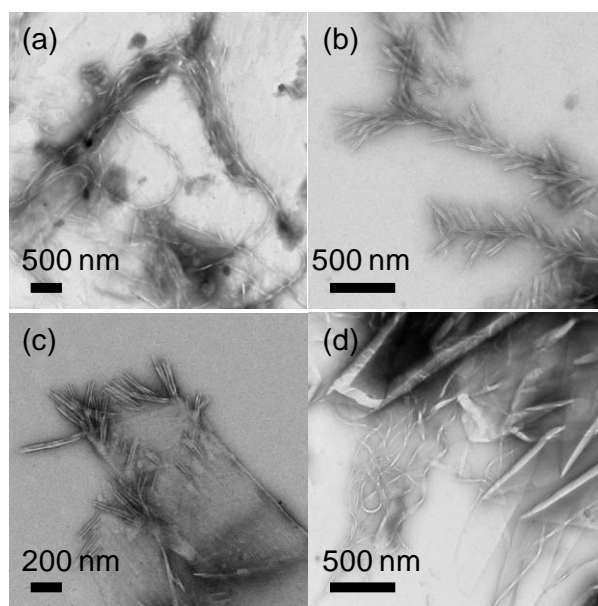

**Figure S5** - Transmission Electron Microscopy (TEM) images of the polymorphic nanoscale structure of Fmoc-SF-OMe. Twisted ribbons, branched twisted ribbons, frayed sheets, and developed nanosheets can be observed from (a-d) respectively. (a) 1 hour, (b,c) 24 hours, (d) 72 hours.

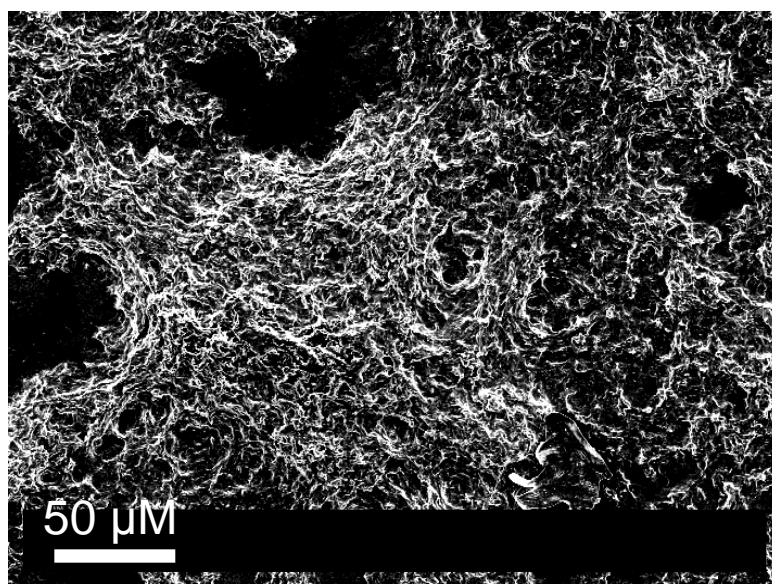

**Figure S6** – SEM image of self-assembled Fmoc-SF-OMe formed in the presence of 0.1 mg/mL *thermolysin*. At this low enzyme concentration only lamellar structures can be seen.

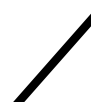

**Figure S7** – schematic of synthesis of Fmoc-SF-OMe. 98 % purity and 21 % yield.

**Characterisation of Fmoc-SF-OMe** – MS (ES+);  $m/z$  488.93  $[M + H]^+$ . Elemental analysis for  $C_{28}H_{28}N_2O_6$ : expected C: 68.8 %, H: 5.8 %, N: 5.7 %; found C: 67.3 %, H: 5.8 %, N: 6.4 %.

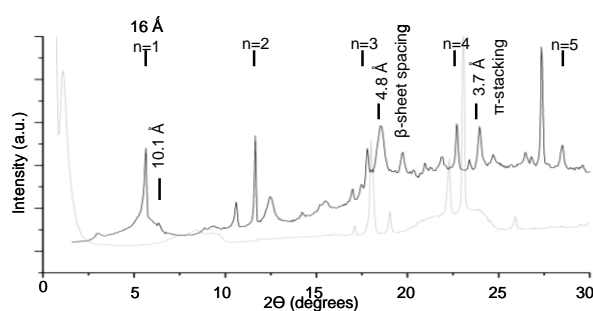

**Figure S8** - WAXS data of dried sample (black spectrum), peaks arising from *thermolysin* and buffer are shown on the grey spectrum. A full list of the peaks obtained from the sample is listed in Table S1.

| Pos. [°2 $\theta$ .] | Height [cts] | d-spacing [Å] | Rel. Int. [%] |
|----------------------|--------------|---------------|---------------|
| 5.5062               | 9775.04      | 16.05037      | 56.35         |
| 6.3251               | 1373.21      | 13.97411      | 7.92          |
| 8.787                | 1643.19      | 10.06366      | 9.47          |
| 9.2575               | 1351.81      | 9.55325       | 7.79          |
| 10.4535              | 4897.91      | 8.4628        | 28.23         |
| 11.5015              | 12757.21     | 7.69388       | 73.54         |
| 12.2759              | 3561.21      | 7.21025       | 20.53         |
| 14.0998              | 2740.14      | 6.28138       | 15.8          |
| 14.6678              | 4452.38      | 6.03941       | 25.67         |
| 15.0995              | 3424.75      | 5.8677        | 19.74         |
| 15.3937              | 3619.05      | 5.75618       | 20.86         |
| 16.8641              | 6225.87      | 5.25749       | 35.89         |
| 17.3514              | 5812.7       | 5.11091       | 33.51         |
| 17.7115              | 10334.59     | 5.0078        | 59.58         |
| 18.5026              | 11496.66     | 4.79543       | 66.27         |
| 19.6172              | 10429.08     | 4.52541       | 60.12         |
| 20.2073              | 7085.78      | 4.39457       | 40.85         |
| 20.8544              | 7385.07      | 4.25965       | 42.57         |
| 21.2134              | 8268.76      | 4.18836       | 47.67         |
| 21.7761              | 9409.22      | 4.08139       | 54.24         |
| 22.6011              | 17346.95     | 3.93424       | 100           |
| 23.278               | 8637.41      | 3.82135       | 49.79         |
| 23.8425              | 13521.52     | 3.73213       | 77.95         |
| 24.5952              | 9923.61      | 3.6196        | 57.21         |
| 25.6305              | 7435.01      | 3.47569       | 42.86         |
| 26.05                | 8696.26      | 3.42067       | 50.13         |
| 26.368               | 10846.1      | 3.38014       | 62.52         |
| 26.6832              | 9078.57      | 3.34091       | 52.34         |
| 27.2791              | 10518.58     | 3.26928       | 60.64         |
| 27.5877              | 8336.17      | 3.23339       | 48.06         |
| 28.388               | 11527.59     | 3.14405       | 66.45         |
| 29.4886              | 7993.81      | 3.02915       | 46.08         |

**Table S1** – full list of peaks obtained for WAXS of dried sample.
